# Supplementary material for: Exploring Pandora's Box: Potential and Pitfalls of Low Coverage Genome Surveys for Evolutionary Biology
Source: PLoS One. 2012 Nov 21;7(11):e49202. doi: 10.1371/journal.pone.0049202 (PMC3504011; doi:10.1371/journal.pone.0049202)
Supplement: Supporting information S4 — Overview over the different mitochondrial genes found in the different libraries. An ‘f’ indicates that the whole gene was found whereas ‘p’ indicates that only a part of the gene was found. (XLS) [file pone.0049202.s004.xls]

## Sheet: mtDNA-Results
Supporting information 4: Overview over the different mitochondrial genes found in the different libraries. An 'f' indicates that the whole gene was found whereas 'p' indicates that only a part of the gene was found.
Gene	Favia	Symbiodinium	Austropallene	Colossendeis	Pallenopsis	Uristes	Euphausia	Nematocarcinus	Hyas	Metopaulias	Sericostoma	Lepetodrilus	Limatula	Arctica	Lissarca	Odontaster	Gorgonocephalus
nad1	p	-	p	p	p	p	p	p	f	p	f	f	f	p	-	-	-
nad2	p	-	p	p	-	p	p	p	f	-	p	f	-	-	-	-	p
nad3	f	-	-	f	p	p	p	p	f	-	f	f	-	p	-	-	-
nad4	f	-	p	p	p	p	-	p	p	p	f	p	p	-	-	-	p
nad4L	f	-	p	f	-	-	p	p	f	-	p	f	-	-	-	-	-
nad5	p	-	p	p	p	p	p	p	f	p	p	p	p	p	-	-	-
nad6	-	-	-	-	-	p	p	p	f	-	-	f	-	-	-	-	-
atp6	f	-	f	f	-	p	p	-	f	p	f	f	-	p	-	-	-
atp8	f	-	*	f	-	*	f	-	f	-	f	*	-	-	-	-	-
cox1	f	p	p	p	p	p	-	p	p	p	f	f	p	-	-	-	p
cox2	f	-	p	f	-	p	-	p	f	-	f	p	p	-	-	-	p
cox3	f	-	p	f	p	p	p	p	f	-	f	p	p	-	-	-	-
cob	p	-	p	p	p	p	p	p	f	p	f	p	p	p	-	-	p
rrnS	-	-	p	-	p	-	-	-	f	p	p	p	p	-	-	-	-
rrnL	-	-	p	p	-	p	p	p	f	p	f	p	p	p	-	-	-
tRNAs	2	0	7	10	3	6	5	12	22	1	17	10	5	1	0	0	2
total, bp	15718	1663	11083	11711	5906	7427	5532	11300	16158	5045	13776	17590	8537	5768	0	0	2870
* = annotated as single pass membrane protein but not exactly as atp8
